# Supplementary material
Source: PubMed Central journal article supplement (PMC4042074)

## SUPPLEMENTARY FIGURE LEGENDS

**Figure S1. CSN4 does not affect mRNA expression of sGC $\alpha$ 1, p53, or CSN5.** (A) LNCaP and (B) CWR-22Rv1 cells were transfected with Ctrl siRNA or CSN4 siRNA and Q-RT-PCR was used to measure mRNA expression of CSN4, sGC $\alpha$ 1, p53, and CSN5.

**Figure S2. CSN4 affects the growth of AR-positive prostate cancer cells, but not AR-negative cells.** (A) LNCaP, C81, and PC-3 cells were transfected with Ctrl siRNA or CSN4 siRNA, with or without CSN4 expression plasmid, and cell density was measured by MTT assay. Data points represent averages of three independent experiments plus standard deviations. Asterisks indicate statistical significance ( $p < 0.03$ ), using the Student's T-test. (B) LNCaP and CWR-22Rv1 cells were transfected with Ctrl siRNA (-) or CSN4 siRNA (+), with or without sGC $\alpha$ 1 expression plasmid, and subjected to Western blotting to measure p53, sGC $\alpha$ 1, and CSN4.  $\beta$ -actin was used as loading control and the molecular weights of the proteins are 53 kDa (p53), 77 kDa (sGC $\alpha$ 1), 49 kDa (CSN4), and 42 kDa ( $\beta$ -actin).

**Figure S3. Cyclase-deficient sGC $\alpha$ 1 rescues the growth of prostate cancer cells depleted for CSN4.** LNCaP cells were transfected with Ctrl siRNA or CSN4 siRNA, with or without sGC $\alpha$ 1(D531A) expression plasmid, and (A) MTT assay was used to measure cell density or (B) Western blotting to measure expression of CSN4, sGC $\alpha$ 1, and sGC $\alpha$ 1(D531A). Asterisks indicate statistical significance ( $p < 0.05$ ), using the Student T-test. (C) LNCaP and CWR-22Rv1 cells were transfected with Ctrl siRNA or CSN4

siRNA and subjected to Western blotting to measure sGC $\beta$ 1, and CSN4. In B and C,  $\beta$ -actin was used as loading control and the molecular weights of the proteins are 53 kDa (p53), 77 kDa (sGC $\alpha$ 1), 77 kDa (sGC $\alpha$ 1-D531A), 49 kDa (CSN4), 72 kDa (sGC $\beta$ 1), and 42 kDa ( $\beta$ -actin).

**Figure S4. p53 does not affect sGC $\alpha$ 1 protein levels nor the growth of prostate cancer cells.** (A) LNCaP and CWR-22Rv1 cells were transfected with Ctrl siRNA or CSN4 siRNA, with or without p53 siRNA, and subjected to Western blotting to measure expression of sGC $\alpha$ 1 and p53 or (B) Q-RT-PCR to measure expression of CSN4. LNCaP and CWR-22Rv1 cells were transfected with Ctrl siRNA or p53 siRNA, and subjected to (C) MTT to measure cell density or (D) Q-RT-PCR to measure expression of p53. (E) CWR-22Rv1 cell extracts were subjected to IP using antibody against sGC $\alpha$ 1. IgG was used as negative control IP. Western blotting was used to measure sGC $\alpha$ 1 (77 kDa), CSN4 (49 kDa), and CSN5 (38 kDa).

**Figure S5. CSN4 mRNA is over-expressed in prostate tumors.** (A) Q-RT-PCR was used to measure expression of CSN4 in normal prostate tissues or prostate tumors. (B) LNCaP and CWR-22Rv1 cells were treated with 25 $\mu$ M or 50  $\mu$ M CID and Western blotting was used to measure sGC $\alpha$ 1 and p53.  $\beta$ -actin was used as loading control.

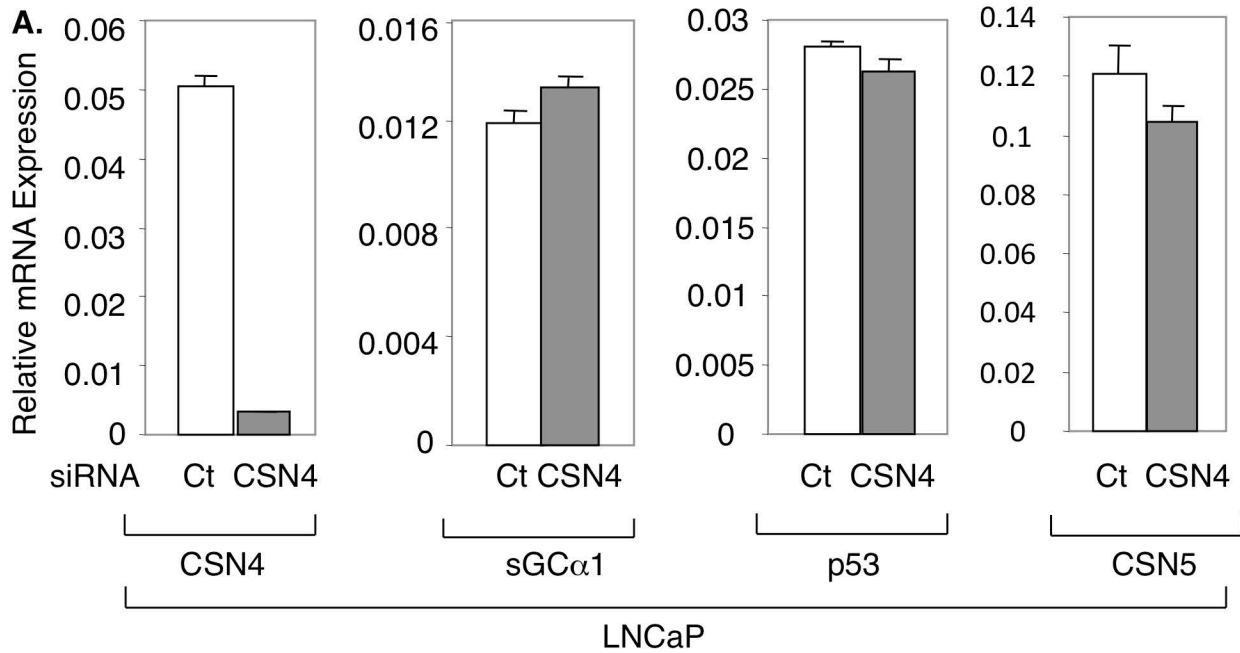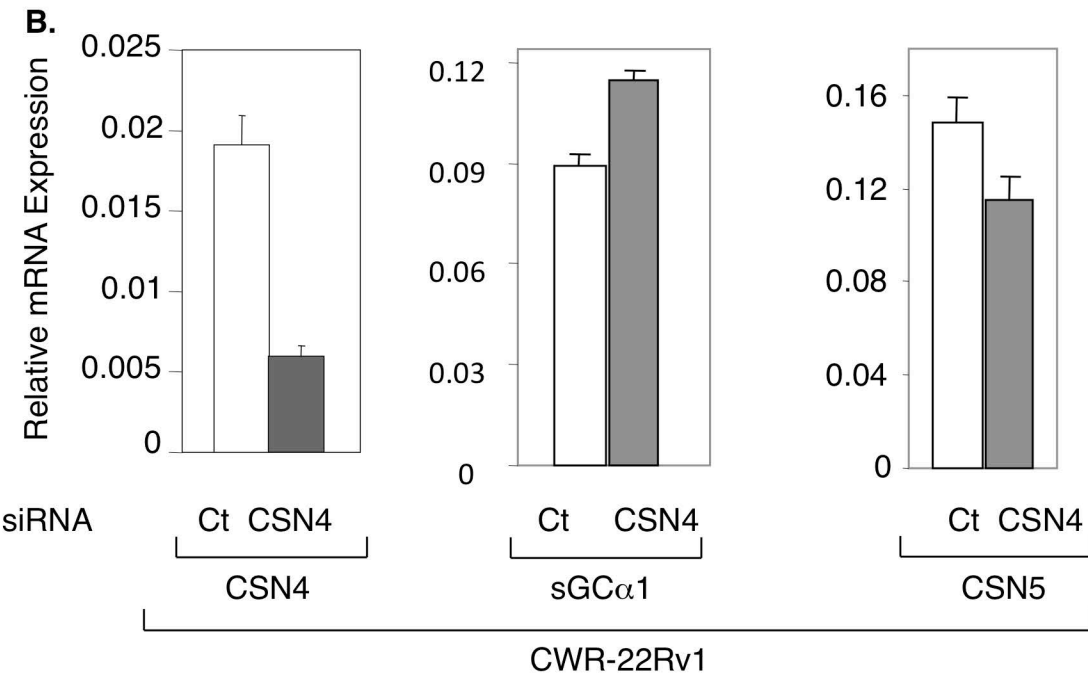

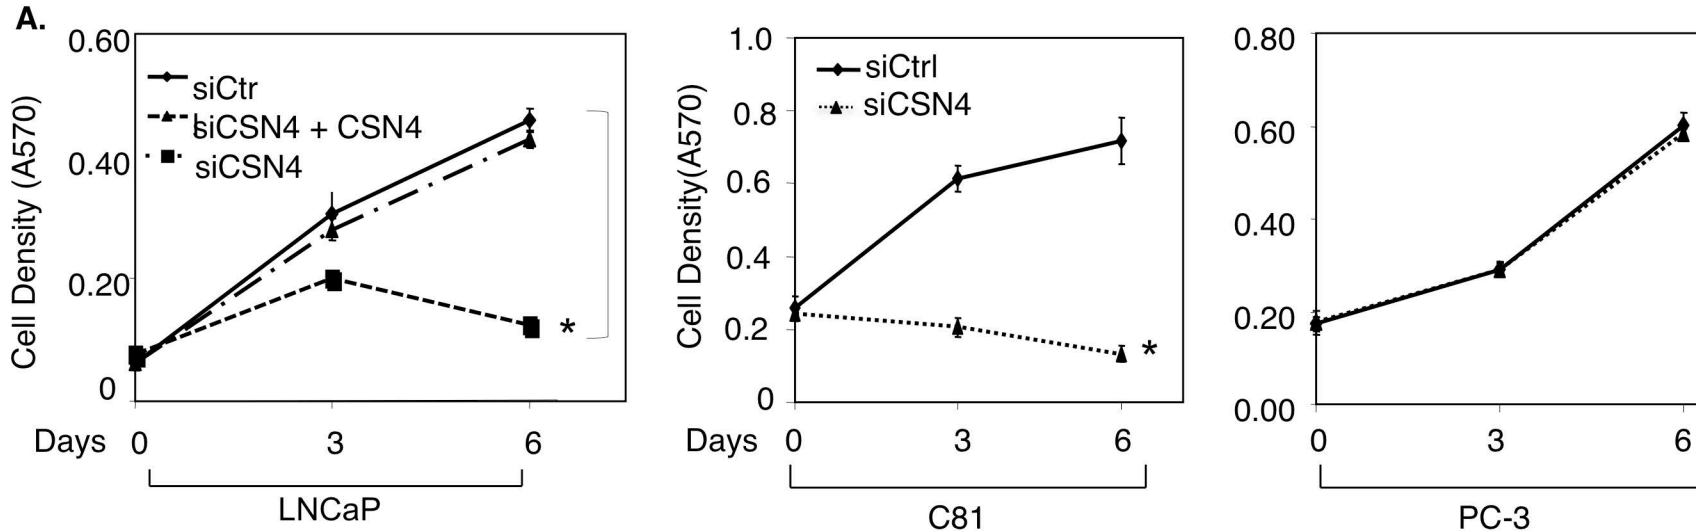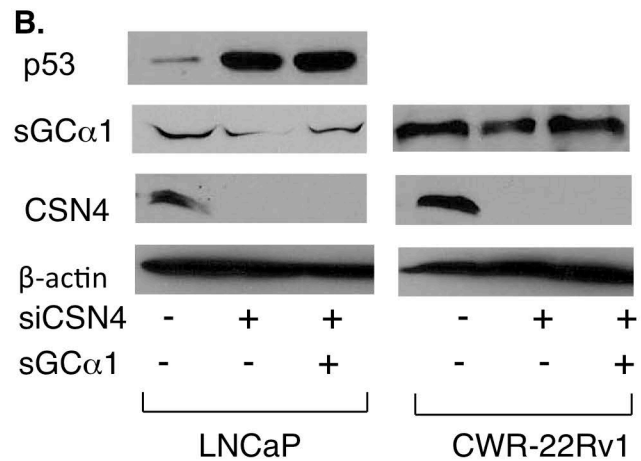

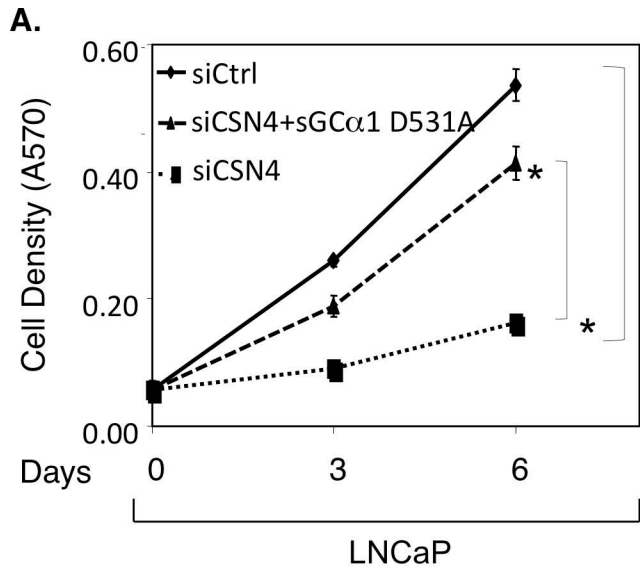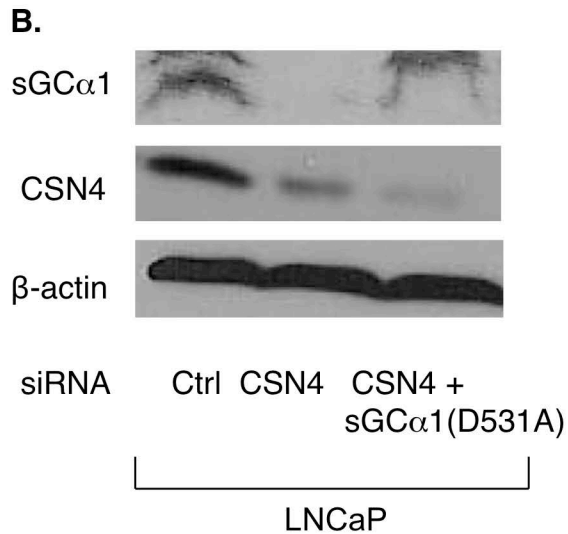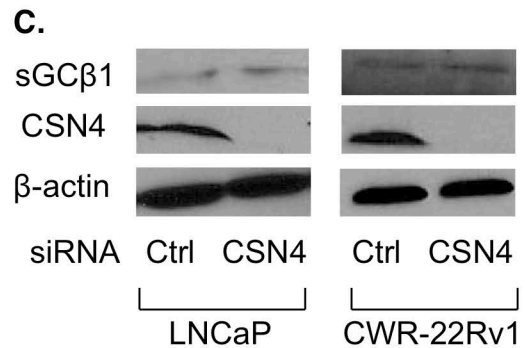

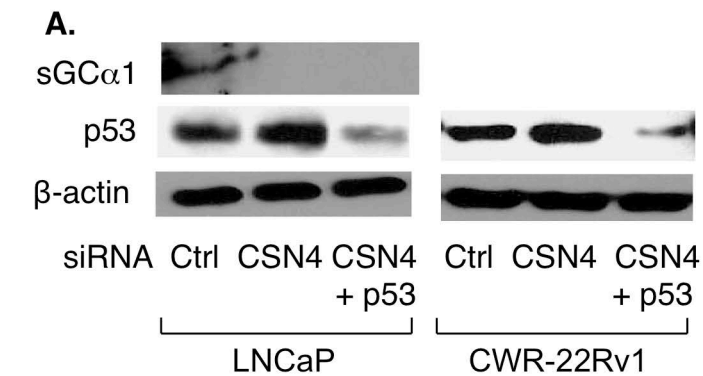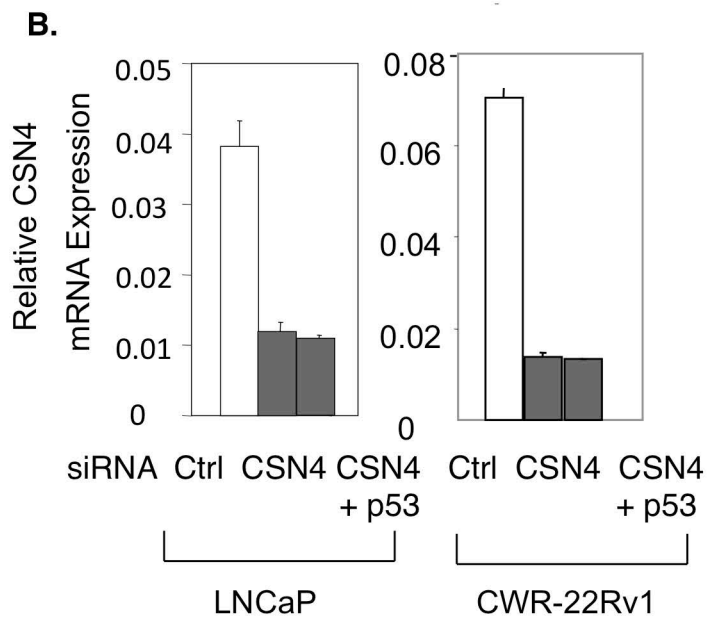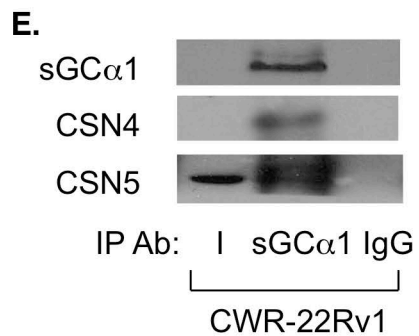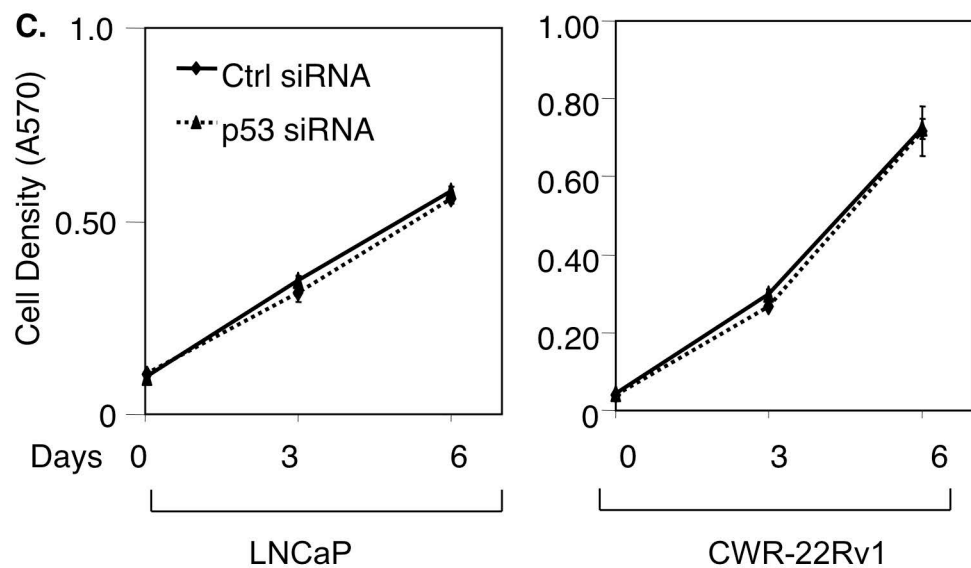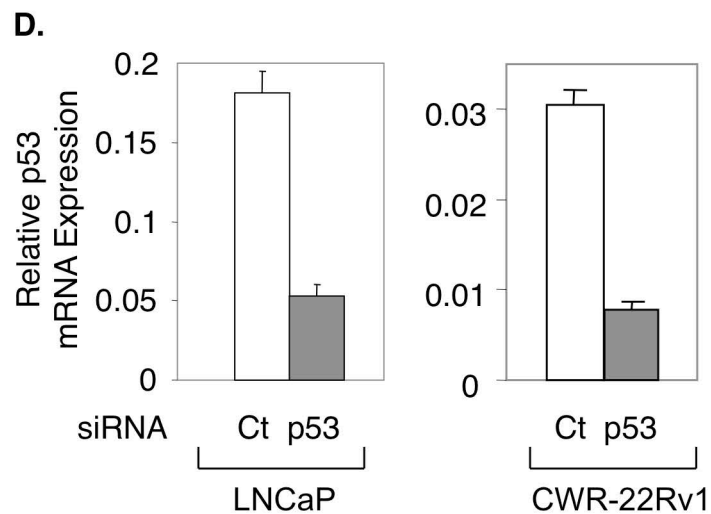

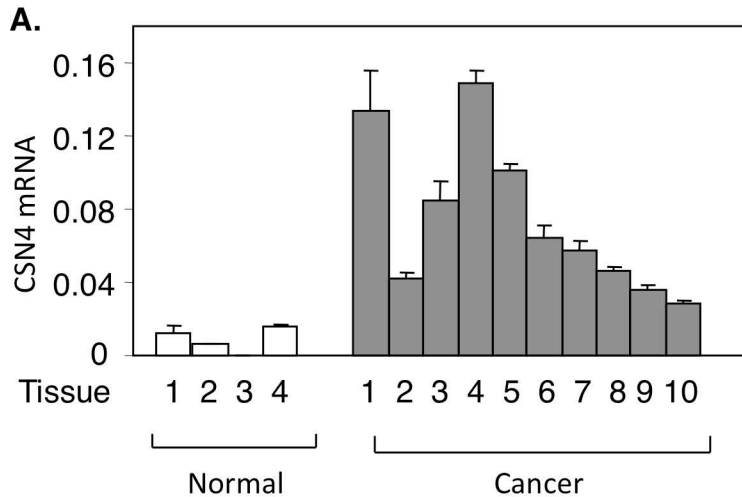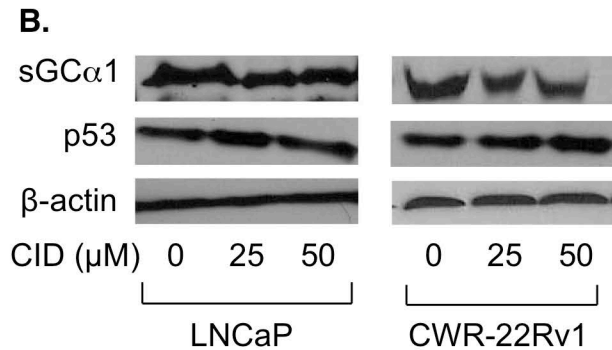

Supplement: me-14-1017.pdf [file me-14-1017.pdf]
